# Supplementary material
Source: PubMed Central journal article supplement (PMC3882437)
Supplement: supp.pdf [file supp.pdf]

## Data Supplements

**Supplemental Table 1.** The other significantly changed genes in lipid metabolism-related pathways by dexamethasone administration in ethanol-fed mouse liver via microarray analysis (Ethanol plus DEX vs. Ethanol).

| EnterzGen                               | Symbol  | <i>q</i> -value | log <sub>2</sub> (fold change) |
|-----------------------------------------|---------|-----------------|--------------------------------|
| Mmu00140 Steroid hormone biosynthesis   |         |                 |                                |
| 13074                                   | Cyp17a1 | 0.0004          | 2.202                          |
| 15496                                   | Hsd3b5  | 0.0008          | 2.370                          |
| 20860                                   | Sult1e1 | 0.0024          | 1.602                          |
| 13112                                   | Cyp3a11 | 0.0029          | 1.306                          |
| 13113                                   | Cyp3a13 | 0.0034          | 1.089                          |
| 27400                                   | Hsd17b6 | 0.0042          | -1.146                         |
| 12846                                   | Comt    | 0.0053          | 0.221                          |
| 56388                                   | Cyp3a25 | 0.0057          | 0.808                          |
| 71773                                   | Ugt2b1  | 0.0090          | 0.122                          |
| 72094                                   | Ugt2a3  | 0.0145          | -0.498                         |
| 394436                                  | Ugt1a1  | 0.0161          | -0.409                         |
| 231396                                  | Ugt2b36 | 0.0202          | 0.287                          |
| 100727                                  | Ugt2b34 | 0.0224          | -0.104                         |
| 15486                                   | Hsd17b2 | 0.0283          | 0.107                          |
| 57357                                   | Srd5a3  | 0.0340          | -0.014                         |
| 15493                                   | Hsd3b2  | 0.0448          | 0.149                          |
| 394434                                  | Ugt1a9  | 0.0503          | 0.367                          |
| 14979                                   | H2-Ke6  | 0.0518          | -0.460                         |
| 394433                                  | Ugt1a5  | 0.0597          | 0.134                          |
| 552899                                  | Ugt2a2  | 0.0709          | 0.049                          |
| 22236                                   | Ugt1a2  | 0.0934          | 0.022                          |
| Mmu00120 Primary bile acid biosynthesis |         |                 |                                |
| 13123                                   | Cyp7b1  | 0.0006          | 1.481                          |
| 56050                                   | Cyp39a1 | 0.0102          | 1.248                          |
| 26459                                   | Slc27a5 | 0.0117          | 0.047                          |
| 12012                                   | Baat    | 0.0292          | 0.129                          |
| 15488                                   | Hsd17b4 | 0.0719          | 0.131                          |
| 101502                                  | Hsd3b7  | 0.0752          | -0.034                         |
| 17117                                   | Amacr   | 0.0999          | 0.042                          |
| Mmu00830 Retinol metabolism             |         |                 |                                |
| 13094                                   | Cyp2b9  | 0.0000          | -5.443                         |

|        |         |        |        |
|--------|---------|--------|--------|
| 13086  | Cyp2a4  | 0.0005 | -1.954 |
| 13089  | Cyp2b13 | 0.0009 | -2.706 |
| 13082  | Cyp26a1 | 0.0033 | 0.588  |
| 243881 | Cyp2b23 | 0.0040 | -0.158 |
| 19683  | Rdh16   | 0.0056 | -1.371 |
| 19682  | Rdh5    | 0.0056 | 0.657  |
| 26358  | Aldh1a7 | 0.0100 | 0.719  |
| 13087  | Cyp2a5  | 0.0421 | -0.672 |
| 67442  | Retsat  | 0.0434 | 0.376  |
| 13088  | Cyp2b10 | 0.0482 | 0.651  |
| 232174 | Cyp26b1 | 0.0681 | -0.257 |

Mmu04146 Peroxisome

|        |        |        |        |
|--------|--------|--------|--------|
| 11611  | Agxt   | 0.0023 | -1.296 |
| 18631  | Pex11a | 0.0030 | -0.630 |
| 56794  | Hacl1  | 0.0077 | 0.720  |
| 19301  | Pxmp2  | 0.0113 | 0.485  |
| 15112  | Hao1   | 0.0131 | 0.841  |
| 19193  | Pipox  | 0.0139 | -0.504 |
| 212503 | Paox   | 0.0254 | -0.331 |
| 18632  | Pex11b | 0.0263 | 0.252  |
| 19302  | Pxmp3  | 0.0279 | 0.507  |
| 19298  | Pex19  | 0.0311 | 0.281  |
| 19299  | Abcd3  | 0.0314 | -0.154 |
| 26874  | Abcd2  | 0.0333 | -0.138 |
| 18634  | Pex7   | 0.0393 | -0.044 |
| 11666  | Abcd1  | 0.0425 | 0.079  |
| 67993  | Nudt12 | 0.0427 | 0.759  |
| 54683  | Prdx5  | 0.0430 | 0.369  |
| 17527  | Mpv17  | 0.0474 | 0.036  |
| 20655  | Sod1   | 0.0504 | -0.129 |
| 15356  | Hmgcl  | 0.0546 | -0.126 |
| 68603  | Pmvk   | 0.0712 | -0.009 |
| 72129  | Pex13  | 0.0844 | 0.261  |
| 56535  | Pex3   | 0.0850 | 0.170  |

Mmu00071 Fatty acid metabolism

|        |          |        |        |
|--------|----------|--------|--------|
| 277753 | Cyp4a12a | 0.0001 | 3.455  |
| 13118  | Cyp4a12b | 0.0002 | 3.093  |
| 13119  | Cyp4a14  | 0.0024 | -0.883 |
| 666168 | Cyp4a31  | 0.0032 | -0.573 |
| 13177  | Dci      | 0.0089 | -0.401 |
| 11370  | Acadv1   | 0.0226 | -0.242 |
| 11409  | Acads    | 0.0235 | -0.503 |
| 66885  | Acadsb   | 0.0568 | -0.446 |

|                                       |         |        |        |
|---------------------------------------|---------|--------|--------|
| 231086                                | Hadhb   | 0.0899 | -0.051 |
| Mmu04142 Lysosome                     |         |        |        |
| 74008                                 | Arsg    | 0.0048 | 1.223  |
| 12512                                 | Cd63    | 0.0067 | -0.111 |
| 12757                                 | Clta    | 0.0090 | -0.565 |
| 16784                                 | Lamp2   | 0.0094 | 0.719  |
| 67963                                 | Npc2    | 0.0127 | -0.427 |
| 52120                                 | Hgsnat  | 0.0146 | -0.375 |
| 19025                                 | Ctsa    | 0.0184 | -0.776 |
| 18145                                 | Npc1    | 0.0273 | -0.283 |
| 16792                                 | Laptm5  | 0.0276 | -0.700 |
| 56629                                 | Dnase2b | 0.0315 | 0.140  |
| 27419                                 | Naglu   | 0.0319 | -0.321 |
| 110173                                | Manba   | 0.0330 | -0.233 |
| 15586                                 | Hyal1   | 0.0336 | 0.315  |
| 12751                                 | Tpp1    | 0.0338 | -0.310 |
| 17113                                 | M6pr    | 0.0363 | -0.318 |
| 17159                                 | Man2b1  | 0.0383 | -0.278 |
| 14387                                 | Gaa     | 0.0433 | 0.048  |
| 15931                                 | Ids     | 0.0502 | -0.299 |
| 12752                                 | Cln3    | 0.0515 | -0.325 |
| 74105                                 | Gga2    | 0.0539 | -0.249 |
| 16783                                 | Lamp1   | 0.0586 | -0.082 |
| 67464                                 | Entpd4  | 0.0588 | -0.169 |
| 83429                                 | Ctns    | 0.0605 | -0.332 |
| 19156                                 | Psap    | 0.0617 | 0.038  |
| 11765                                 | Ap1g1   | 0.0635 | 0.157  |
| 67489                                 | Ap4b1   | 0.0661 | 0.072  |
| 12514                                 | Cd68    | 0.0697 | 0.081  |
| 13040                                 | Ctss    | 0.0700 | -0.148 |
| 11766                                 | Ap1g2   | 0.0725 | 0.265  |
| 214505                                | Gnptg   | 0.0767 | 0.137  |
| 94178                                 | Mcoln1  | 0.0853 | -0.114 |
| 64138                                 | Ctsz    | 0.0868 | -0.118 |
| 11774                                 | Ap3b1   | 0.0883 | 0.126  |
| 74325                                 | Cltb    | 0.0929 | 0.343  |
| 11881                                 | Arsb    | 0.0951 | 0.168  |
| 19063                                 | Ppt1    | 0.0971 | 0.165  |
| 16541                                 | Napsa   | 0.0996 | 0.076  |
| Mmu00010 Glycolysis / Gluconeogenesis |         |        |        |
| 103988                                | Gck     | 0.0028 | -0.144 |
| 11671                                 | Aldh3a2 | 0.0049 | -0.819 |
| 14377                                 | G6pc    | 0.0059 | -0.900 |

|           |              |        |        |
|-----------|--------------|--------|--------|
| 18770     | Pklr         | 0.0063 | -0.570 |
| 230163    | Aldob        | 0.0105 | -0.337 |
| 68263     | Pdhb         | 0.0150 | -0.627 |
| 58810     | Akr1a4       | 0.0186 | -0.313 |
| 18655     | Pgk1         | 0.0186 | 0.455  |
| 11674     | Aldoa        | 0.0221 | 0.515  |
| 18642     | Pfkm         | 0.0261 | -0.500 |
| 18641     | Pfkl         | 0.0358 | 0.082  |
| 18746     | Pkm2         | 0.0392 | -0.331 |
| 16828     | Ldha         | 0.0406 | 0.172  |
| 72535     | Aldh1b1      | 0.0432 | -0.133 |
| 14751     | Gpi1         | 0.0437 | -0.236 |
| 14121     | Fbp1         | 0.0442 | -0.411 |
| 18597     | Pdha1        | 0.0486 | -0.012 |
| 11668     | Aldh1a1      | 0.0566 | -0.126 |
| 14433     | Gapdh        | 0.0652 | 0.165  |
| 11676     | Aldoc        | 0.0682 | -0.199 |
| 100045967 | LOC100045967 | 0.0704 | -0.240 |
| 433182    | Gm5506       | 0.0810 | -0.172 |
| 433229    | Gm5514       | 0.0982 | -0.098 |

Mmu04145 Phagosome

|        |         |        |        |
|--------|---------|--------|--------|
| 14961  | H2-Ab1  | 0.0028 | -1.100 |
| 67951  | Tubb6   | 0.0034 | -0.449 |
| 20390  | Sftpd   | 0.0035 | 0.779  |
| 22154  | Tubb5   | 0.0037 | -0.772 |
| 71693  | Colec11 | 0.0061 | -0.619 |
| 12475  | Cd14    | 0.0063 | -0.227 |
| 73710  | Tubb2b  | 0.0075 | 0.195  |
| 17195  | Mbl2    | 0.0093 | -0.839 |
| 227613 | Tubb2c  | 0.0098 | -0.156 |
| 11461  | Actb    | 0.0099 | -0.036 |
| 14969  | H2-Eb1  | 0.0106 | -0.637 |
| 14960  | H2-Aa   | 0.0114 | -0.730 |
| 17533  | Mrc1    | 0.0125 | -0.459 |
| 19345  | Rab5c   | 0.0190 | 0.189  |
| 20333  | Sec22b  | 0.0192 | 0.442  |
| 16419  | Itgb5   | 0.0210 | 0.257  |
| 56644  | Clec7a  | 0.0214 | -0.182 |
| 12317  | Calr    | 0.0236 | 0.755  |
| 15040  | H2-T23  | 0.0293 | -0.395 |
| 13057  | Cyba    | 0.0307 | -0.131 |
| 66212  | Sec61b  | 0.0358 | 0.445  |
| 280408 | Rilp    | 0.0512 | -0.176 |
| 22143  | Tuba1b  | 0.0525 | 0.251  |

|        |         |        |        |
|--------|---------|--------|--------|
| 110557 | H2-Q6   | 0.0585 | 0.055  |
| 14972  | H2-K1   | 0.0673 | -0.518 |
| 22142  | Tuba1a  | 0.0704 | 0.000  |
| 22153  | Tubb4   | 0.0720 | 0.109  |
| 22144  | Tuba3a  | 0.0739 | -0.054 |
| 53421  | Sec61a1 | 0.0756 | -0.030 |
| 21826  | Thbs2   | 0.0788 | -0.101 |
| 19353  | Rac1    | 0.0808 | -0.177 |
| 53857  | Tuba8   | 0.0880 | -0.183 |
| 21828  | Thbs4   | 0.0922 | 0.083  |
| 16402  | Itga5   | 0.0930 | 0.139  |
| 20778  | Scarb1  | 0.0940 | 0.198  |
| 14991  | H2-M3   | 0.0989 | 0.041  |

Mmu00190 Oxidative phosphorylation

|        |            |        |        |
|--------|------------|--------|--------|
| 76429  | Lhpp       | 0.0084 | -0.667 |
| 12856  | Cox17      | 0.0176 | -0.186 |
| 228033 | Atp5g3     | 0.0185 | -0.260 |
| 67895  | Ppa1       | 0.0191 | 0.567  |
| 74776  | Ppa2       | 0.0194 | -0.141 |
| 11973  | Atp6v1e1   | 0.0245 | -0.110 |
| 11974  | Atp6v0e    | 0.0272 | 0.484  |
| 12864  | Cox6c      | 0.0291 | 0.229  |
| 66218  | Ndufb9     | 0.0304 | 0.085  |
| 66416  | Ndufa7     | 0.0351 | -0.108 |
| 68375  | Ndufa8     | 0.0367 | 0.358  |
| 66495  | Ndufb3     | 0.0439 | 0.019  |
| 67942  | Atp5g2     | 0.0479 | -0.098 |
| 66043  | Atp5d      | 0.0480 | 0.105  |
| 12866  | Cox7a2     | 0.0482 | 0.250  |
| 67003  | Uqcrc2     | 0.0545 | -0.037 |
| 66377  | Ndufc1     | 0.0556 | 0.144  |
| 66142  | Cox7b      | 0.0580 | 0.218  |
| 27425  | Atp5j      | 0.0598 | -0.039 |
| 71679  | Atp5h      | 0.0626 | -0.062 |
| 28080  | Atp5o (ou) | 0.0627 | 0.180  |
| 11957  | Atp5j      | 0.0631 | 0.272  |
| 72900  | Ndufv2     | 0.0638 | 0.133  |
| 68194  | Ndufb4     | 0.0664 | 0.051  |
| 230075 | Ndufb6     | 0.0717 | 0.252  |
| 12865  | Cox7a1     | 0.0729 | -0.172 |
| 73834  | Atp6v1d    | 0.0731 | 0.005  |
| 11975  | Atp6v0a1   | 0.0731 | 0.080  |
| 11964  | Atp6v1a    | 0.0741 | -0.217 |
| 22273  | Uqcrc1     | 0.0746 | -0.181 |

|       |          |        |        |
|-------|----------|--------|--------|
| 11947 | Atp5b    | 0.0769 | 0.178  |
| 66046 | Ndufb5   | 0.0772 | 0.107  |
| 27060 | Tcirg1   | 0.0779 | -0.533 |
| 17991 | Ndufa2   | 0.0782 | 0.092  |
| 12861 | Cox6a1   | 0.0860 | 0.089  |
| 54405 | Ndufa1   | 0.0867 | 0.267  |
| 66290 | Atp6v1g1 | 0.0873 | 0.061  |
| 66445 | Cyc1     | 0.0998 | -0.025 |

Mmu01040 Biosynthesis of unsaturated fatty acids

|        |        |        |        |
|--------|--------|--------|--------|
| 170439 | Elov16 | 0.0006 | -2.086 |
| 26897  | Acot1  | 0.0008 | -1.123 |
| 171281 | Acot3  | 0.0014 | -0.814 |
| 68801  | Elov15 | 0.0200 | -0.012 |
| 76267  | Fads1  | 0.0303 | -0.339 |
| 111175 | Pecr   | 0.0337 | -0.388 |
| 171282 | Acot4  | 0.0357 | -0.162 |
| 171210 | Acot2  | 0.0379 | -0.049 |
| 70025  | Acot7  | 0.0785 | -0.038 |

Mmu00100 Steroid biosynthesis

|        |         |        |        |
|--------|---------|--------|--------|
| 66234  | Sc4mol  | 0.0114 | 1.230  |
| 20775  | Sqle    | 0.0131 | 1.311  |
| 73166  | Tm7sf2  | 0.0136 | -0.534 |
| 223920 | Soat2   | 0.0252 | 0.002  |
| 18194  | Nsdhl   | 0.0309 | 1.043  |
| 15490  | Hsd17b7 | 0.0380 | 0.595  |
| 13121  | Cyp51   | 0.0471 | 0.794  |
| 74754  | Dhcr24  | 0.0664 | -0.144 |
| 13595  | Ebp     | 0.0870 | 0.073  |
| 12613  | Cel     | 0.0920 | -0.081 |
| 13095  | Cyp2c29 | 0.0007 | -1.989 |
| 226143 | Cyp2c44 | 0.0019 | -1.785 |
| 72082  | Cyp2c55 | 0.0055 | -0.780 |
| 226105 | Cyp2c70 | 0.0080 | -0.205 |
| 74519  | Cyp2j9  | 0.0174 | -0.390 |
| 13077  | Cyp1a2  | 0.0204 | -0.960 |
| 107141 | Cyp2c50 | 0.0268 | -0.713 |
| 83702  | Akr1c6  | 0.0423 | -0.250 |
| 13096  | Cyp2c37 | 0.0719 | -0.606 |
| 13098  | Cyp2c39 | 0.0842 | 0.164  |

Mmu00020 Citrate cycle (TCA cycle)

|        |      |        |        |
|--------|------|--------|--------|
| 104112 | Acly | 0.0022 | -1.222 |
| 269951 | Idh2 | 0.0191 | -0.675 |

|        |       |        |        |
|--------|-------|--------|--------|
| 15926  | Idh1  | 0.0248 | -0.212 |
| 15929  | Idh3g | 0.0296 | 0.270  |
| 12974  | Cs    | 0.0411 | -0.170 |
| 18563  | Pcx   | 0.0497 | 0.149  |
| 170718 | Idh3b | 0.0523 | -0.146 |
| 18293  | Ogdh  | 0.0607 | -0.178 |
| 11428  | Aco1  | 0.0617 | -0.085 |
| 66925  | Sdhd  | 0.0851 | -0.125 |
| 67834  | Idh3a | 0.0996 | 0.116  |

Mmu00561 Glycerolipid metabolism

|        |          |        |        |
|--------|----------|--------|--------|
| 225913 | Dak      | 0.0015 | -1.179 |
| 67800  | Dgat2    | 0.0054 | -0.773 |
| 19012  | Ppap2a   | 0.0079 | -0.383 |
| 67512  | Agpat2   | 0.0139 | 0.742  |
| 102247 | Agpat6   | 0.0187 | -0.685 |
| 11997  | Akr1b7   | 0.0207 | 0.539  |
| 218121 | Mboat1   | 0.0362 | 0.185  |
| 28169  | Agpat3   | 0.0490 | 0.244  |
| 67916  | Ppap2b   | 0.0533 | -0.311 |
| 14732  | Gpam     | 0.0580 | 0.395  |
| 110524 | Dgkq     | 0.0594 | -0.053 |
| 231510 | Agpat9   | 0.0619 | -0.072 |
| 68262  | Agpat4   | 0.0856 | -0.078 |
| 18947  | Pnliprp2 | 0.0911 | -0.125 |
| 380921 | Dgkh     | 0.0991 | -0.051 |

Mmu00600 Sphingolipid metabolism

|        |       |        |        |
|--------|-------|--------|--------|
| 58994  | Smpd3 | 0.0049 | 0.613  |
| 22234  | Ugcg  | 0.0068 | -0.520 |
| 74442  | Sgms2 | 0.0080 | 0.449  |
| 230379 | Acer2 | 0.0104 | -0.495 |
| 56632  | Sphk2 | 0.0159 | 0.062  |
| 11883  | Arsa  | 0.0195 | -0.385 |
| 18010  | Neu1  | 0.0214 | 0.053  |
| 20597  | Smpd1 | 0.0289 | 0.196  |
| 70750  | Kdsr  | 0.0397 | -0.174 |
| 13244  | Degs1 | 0.0405 | -0.488 |
| 66190  | Acer3 | 0.0406 | -0.327 |
| 23956  | Neu2  | 0.0469 | 0.096  |
| 20397  | Sgpl1 | 0.0622 | -0.055 |
| 11886  | Asah1 | 0.0703 | 0.041  |
| 20598  | Smpd2 | 0.0729 | -0.147 |
| 70059  | Degs2 | 0.0795 | 0.057  |

Mmu00564 Glycerophospholipid metabolism

|        |          |        |        |
|--------|----------|--------|--------|
| 14571  | Gpd2     | 0.0033 | -1.296 |
| 12660  | Chka     | 0.0041 | -0.767 |
| 212862 | Chpt1    | 0.0087 | 0.925  |
| 226856 | Lpgat1   | 0.0109 | 0.262  |
| 192654 | Pla2g15  | 0.0217 | 0.116  |
| 66350  | Pla2g12a | 0.0230 | -0.227 |
| 66826  | Taz      | 0.0350 | 0.196  |
| 18777  | Lypla1   | 0.0556 | 0.599  |
| 214253 | Etnk2    | 0.0604 | -0.279 |
| 69836  | Pla2g12b | 0.0717 | 0.199  |
| 665270 | Plb1     | 0.0727 | -0.081 |
| 14712  | Gnpat    | 0.0791 | 0.090  |
| 27388  | Ptdss2   | 0.0820 | 0.062  |
| 28042  | Ept1     | 0.0910 | 0.158  |
| 237625 | Pla2g3   | 0.0927 | 0.062  |
| 66586  | Crls1    | 0.0946 | 0.272  |

Mmu04975 Fat digestion and absorption

|        |       |        |        |
|--------|-------|--------|--------|
| 238055 | Apob  | 0.0033 | 0.419  |
| 11808  | Apoa4 | 0.0052 | 1.904  |
| 27409  | Abcg5 | 0.0135 | 0.106  |
| 20661  | Sort1 | 0.0243 | -0.721 |
| 17777  | Mttp  | 0.0319 | 0.459  |
| 67470  | Abcg8 | 0.0558 | -0.358 |

---
